# Supplementary material
Source: publisher figshare collection journal article supplement (https://acs.figshare.com/ndownloader/files/18726047)
Supplement: Supplementary file 1 [file 18726047]

Compound	SMILES	MCF-7 IC50 (uM)	MDA-MB-468 IC50 (uM)	SK-BR-3IC50 (uM)	HT-29 IC50 (uM)	MOLT-4 IC50 (uM)	MV-4-11 IC50 (uM)	A2058 IC50 (uM)	MRC-5 IC50 (uM)	DYRK1A IC50 (uM)	ERK8 IC50 (uM)	PIM1 IC50 (uM)	PIM2 IC50 (uM)	PIM3 IC50 (uM)	SIK3 IC50 (uM)	GCK IC50 (uM)	TAK1 IC50 (uM)	MLK1 IC50 (uM)	MLK3 IC50 (uM)	RIPK2 IC50 (uM)	Aurora A IC50 (uM)	Aurora B IC50 (uM)	DRAK2 Kd (uM)	STK35 Kd (uM)	DRAK1 Kd (uM)	MYLK4 Kd (uM)	IRAK3 Kd (uM)	PIK4CB Kd (uM)	GAK Kd (uM)	TYK2* Kd (uM)	RIOK1 Kd (uM)	JAK1* Kd (uM)	DCAMKL3 Kd (uM)	CSNK1E Kd (uM)	PIKFYVE Kd (uM)	CIT Kd (uM)	PIM3 Kd (uM)	BIKE Kd (uM)	STK36 Kd (uM)	FLT3 (N841I mutant) Kd (uM)	PIM1 Kd (uM)	MDA-MB-468 IC50 (uM) and Z-score	MCF-7 IC50 (uM) and Z-score	MT3 IC50 (uM) and Z-score	PLCPRF5 IC50 (uM) and Z-score	SK-BR-3 IC50 (uM) and Z-score	NCIH460 IC50 (uM) and Z-score	A673 IC50 (uM) and Z-score	JAR IC50 (uM) and Z-score
1	BrC1=CC(OC)=C2C(NC=C2C3=C(I)N=C(C4=CC=CN4)O3)=C1	>10	>10	>10	>10	>10	>10	>10	>10	>50	>50	>50	>50	>50	>50	>50	>50	>50	>50	>50	>50	>50
2	BrC1=CC(OC)=C2C(NC=C2C3=CN=C(C4=CC=C(Br)N4)O3)=C1	>10	>10	>10	>10	>10	>10	>10	>10	>50	>50	>50	>50	>50	>50	>50	>50	>50	>50	>50	>50	>50
3	BrC1=C(OC)C=C2C(NC=C2C3=CN=C(C4=CC=CN4)O3)=C1	8.5 ± 0.2	>10	>10	7.1 ± 0.2	9.9 ± 0.4	4.4 ± 0.5	>10	7.1 ± 0.6	2.3 ± 0.2	1.0 ± 0.1	0.2 ± 0.05	11 ± 2	1.8 ± 0.1	1.2 ± 0.1	0.6 ± 0.06	1.2 ± 0.1	0.6 ± 0.12	0.6 ± 0.05	1.1 ± 0.2	22 ± 6	0.8 ± 0.02	0.39 ± 0.04	1.3 ± 0.1	2.8 ± 1.3	0.43 ± 0.07	1.7 ± 0.2	2.9 ± 0.3	0.44 ± 0.02	1.8 ± 0.1	2.9 ± 1.8	1.0 ± 0.1	1.8 ± 0.2	3.3 ± 0.2	1.0 ± 0.1	2.7 ± 0.1	4.7 ± 0.3	1.1 ± 0.1	2.7 ± 0.1	8.9 ± 4.2	1.2 ± 0.3	0.34 -3.87	0.77 -2.47	0.93 -2.35	1.5 -1.6	1.5 -1.1	2 -1.0	2.2 -1.0	2.3 -0.8
4	BrC1=CC(OC)=C2C(NC=C2C3=CN=C(C4=CC=CN4)O3)=C1	3.9 ± 0.3	>10	>10	>10	>10	>10	>10	>10	>50	46 ± 7	0.9 ± 0.01	22 ± 3	3.7 ± 0.8	>50	1.2 ± 0.1	1.0 ± 0.1	0.9 ± 0.04	0.5 ± 0.05	>50	>50	0.9 ± 0.23
5	BrC1=CC(OC)=C2C(NC=C2C3=CN=C(C4=CC(Br)=CN4)O3)=C1	>10	>10	>10	>10	>10	>10	>10	>10	>50	>50	43 ± 12	>50	>50	>50	>50	36 ± 15	22 ± 2	23 ± 2	>50	>50	7.8 ± 0.2
6	BrC1=CC(OC)=C2C(NC(I)=C2C3=CN=C(C4=CC=CN4)O3)=C1	>10	>10	>10	>10	>10	>10	>10	>10	>50	>50	18 ± 9	>50	>50	>50	40 ± 5	18 ± 7	21 ± 7	19 ± 2	>50	>50	31 ± 3
[truncated: 2 more columns]
